# Supplementary material for: Genome-wide identification of natural RNA aptamers in prokaryotes and eukaryotes
Source: PubMed Central journal article supplement (PMC5876405; doi:10.1038/s41467-018-03675-1), 2018-03-29
Supplement: 41467_2018_3675_MOESM1_ESM.pdf [file 41467_2018_3675_MOESM1_ESM.pdf]

## **Supplementary Information**

Genome-wide identification of natural RNA aptamers in prokaryotes and eukaryotes.

Tapsin S. et al.

The supplementary information consists of 12 Supplementary Figures, 3 Supplementary Tables, and Supplementary references.

# Supplementary Figure 1

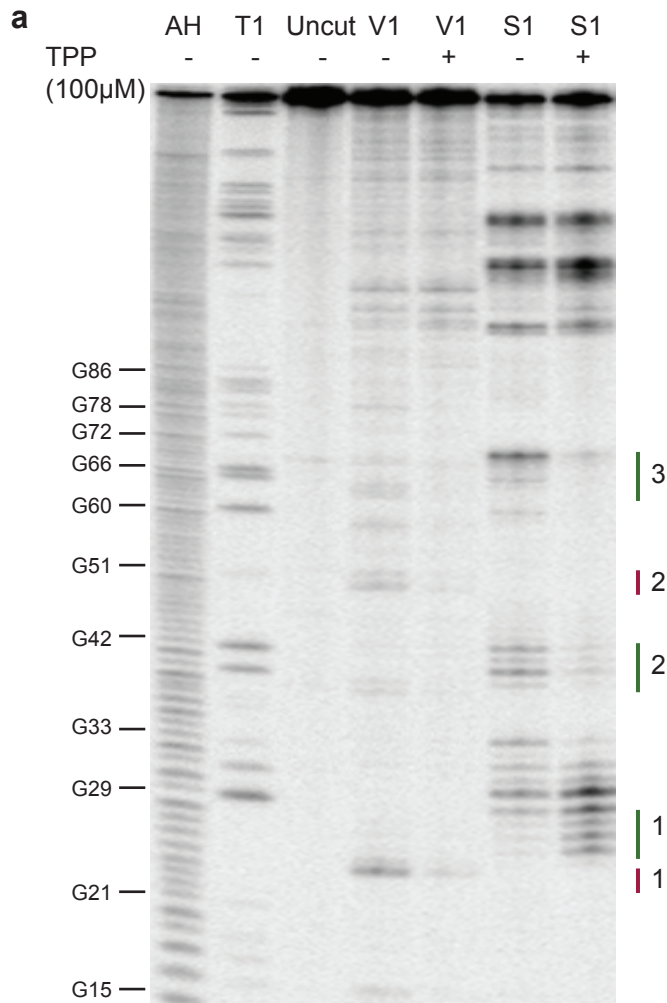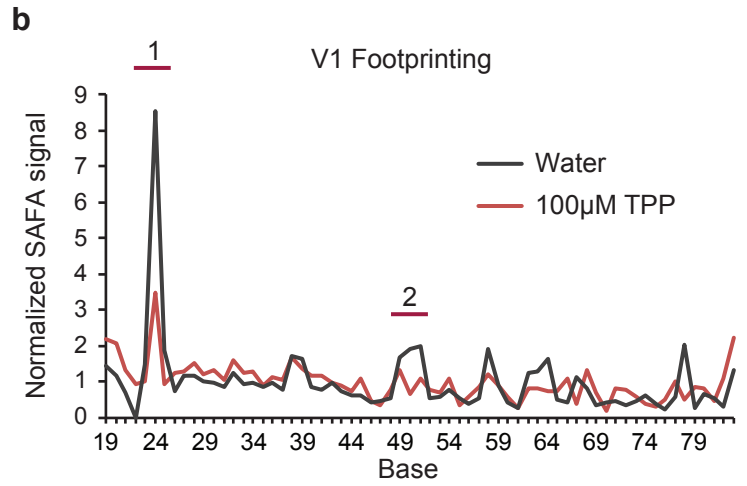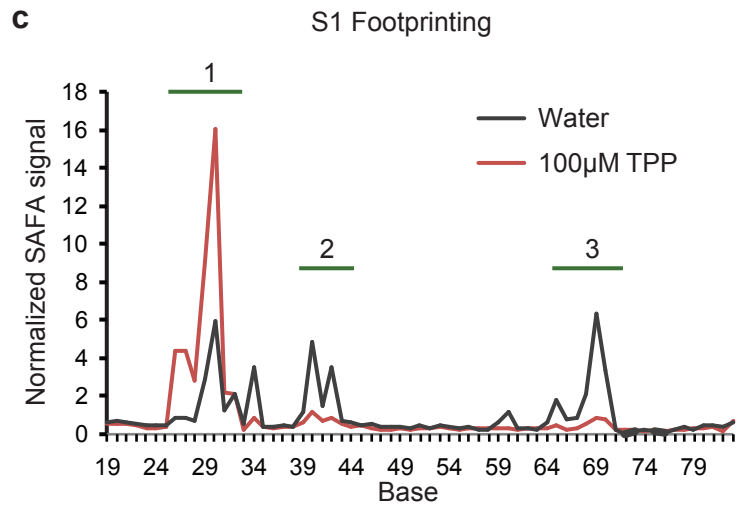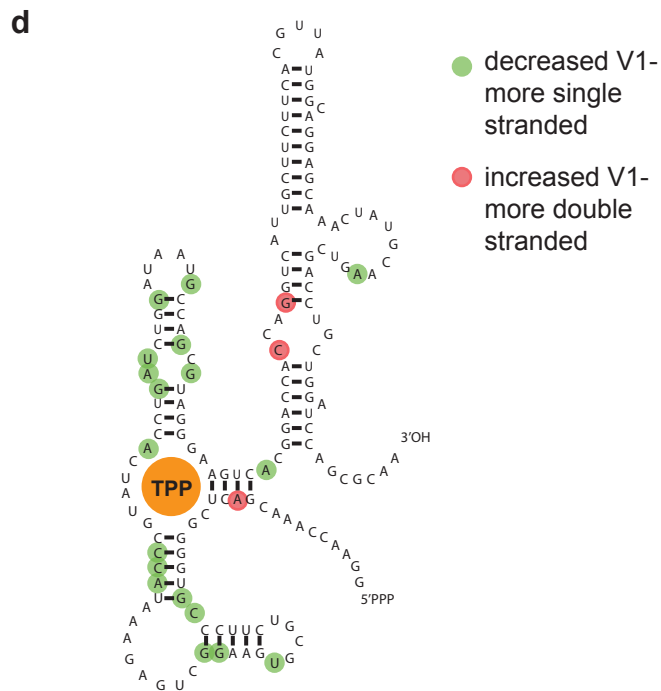

**Supplementary Figure 1. PARCEL detects ligand-induced structure changes similar to RNA footprinting.** **a**, Gel image of the *E. coli* TPP riboswitch, thiM, structure probed in the presence and absence of 100μM TPP using RNase V1 (lanes 4,5) and S1 nuclease (lanes 6,7). We also include alkaline hydrolysis (lane 1, AH), G ladder (lane 2, T1), and full length RNA without nuclease treatment (lane 3, Uncut) for comparison. The red and green bars indicate double- and single-stranded changing regions respectively. **b,c**, SAFA<sup>1</sup> quantification of the TPP riboswitch structure probed with RNase V1 (**b**) or S1 nuclease (**c**) in the presence (red line) or absence (black line) of TPP. Manual structure probing agrees with high-throughput sequencing data in **Figure 1b**. **d**, Secondary structure model of the TPP riboswitch bound to TPP. The green circles indicate bases that become more single-stranded and red circles indicate bases that become more double-stranded upon TPP binding.

## Supplementary Figure 2

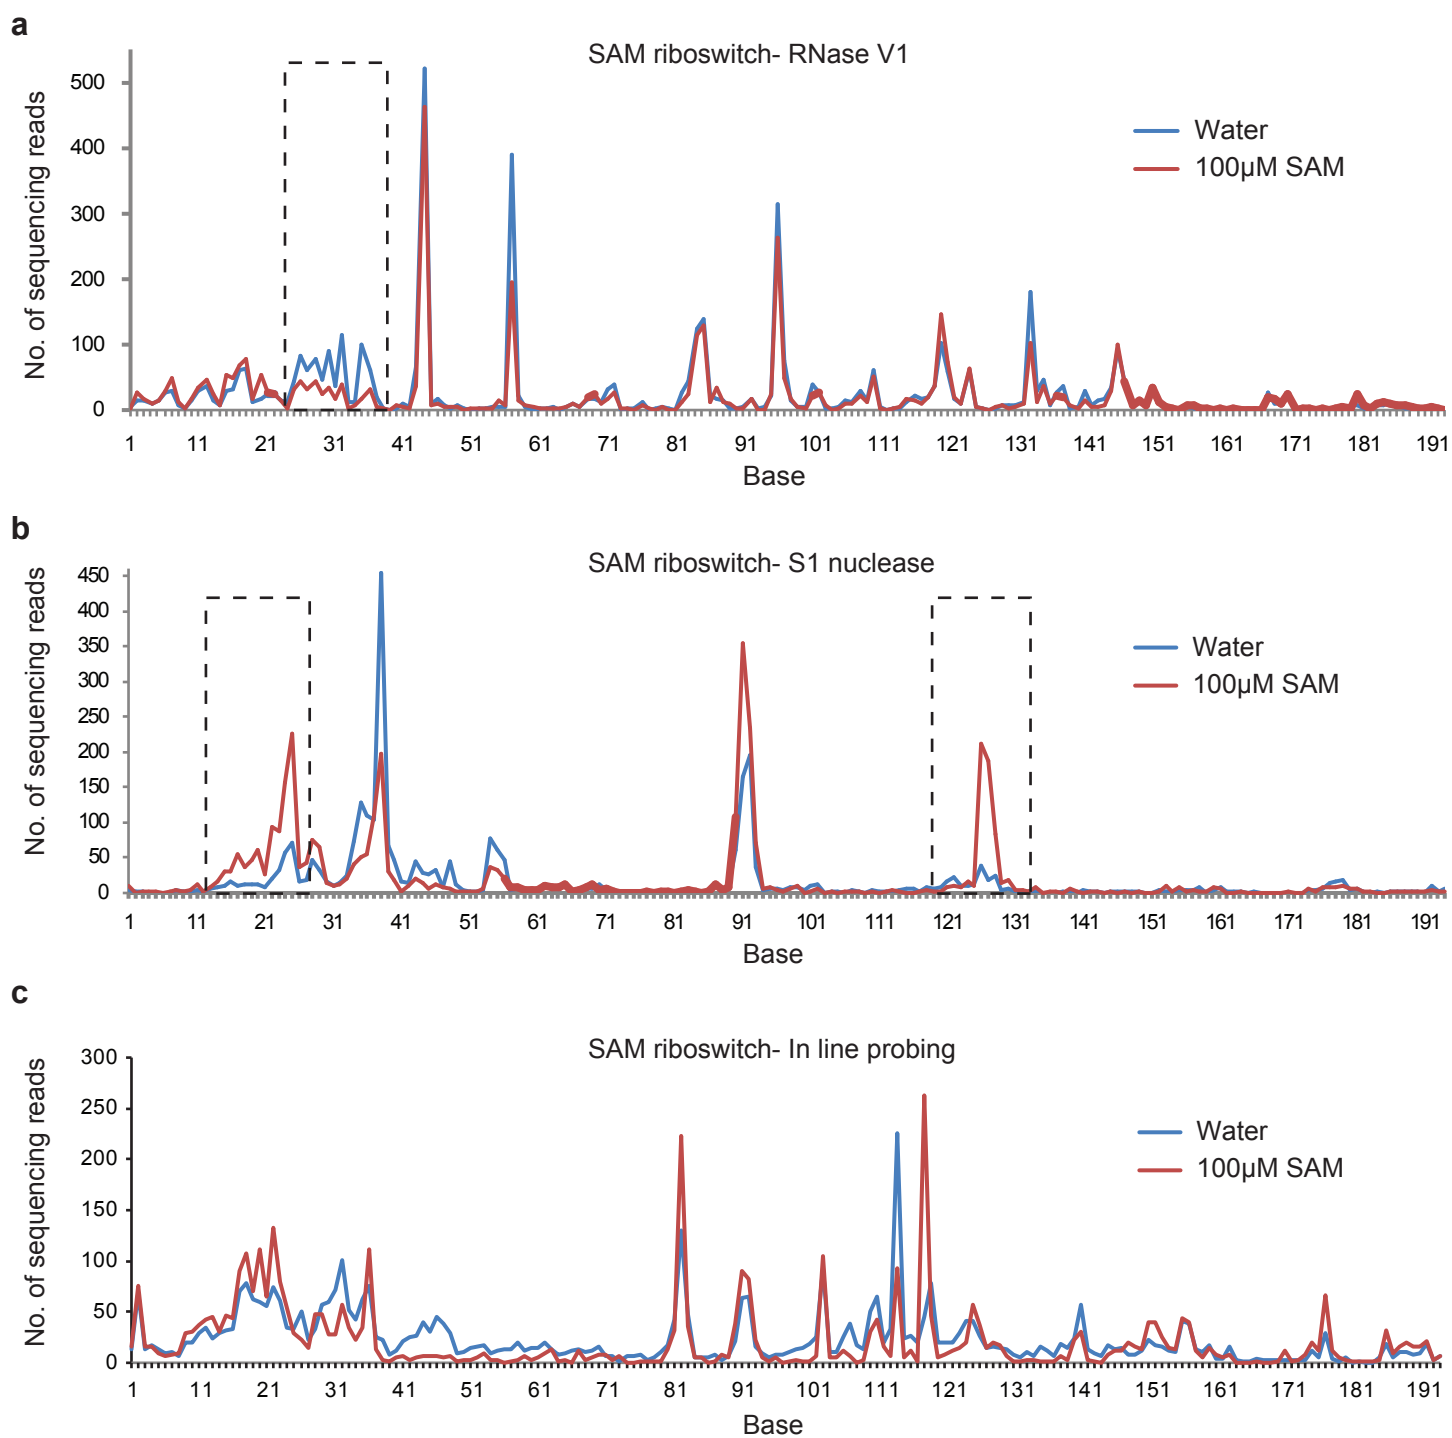

**Supplementary Figure 2. PARCEL can detect structure changes for a known SAM riboswitch.** High-throughput sequencing reads for the known SAM riboswitch, *yitJ* gene, in *B. subtilis*<sup>2</sup>. *yitJ* was structure probed with RNase V1 (a), S1 nuclease (b), or in-line probing<sup>3</sup> (c), in the presence (red line) and absence (blue line) of 100 µM SAM. The dotted box indicates the region of structural change upon ligand binding as detected by deep sequencing.

### Supplementary Figure 3

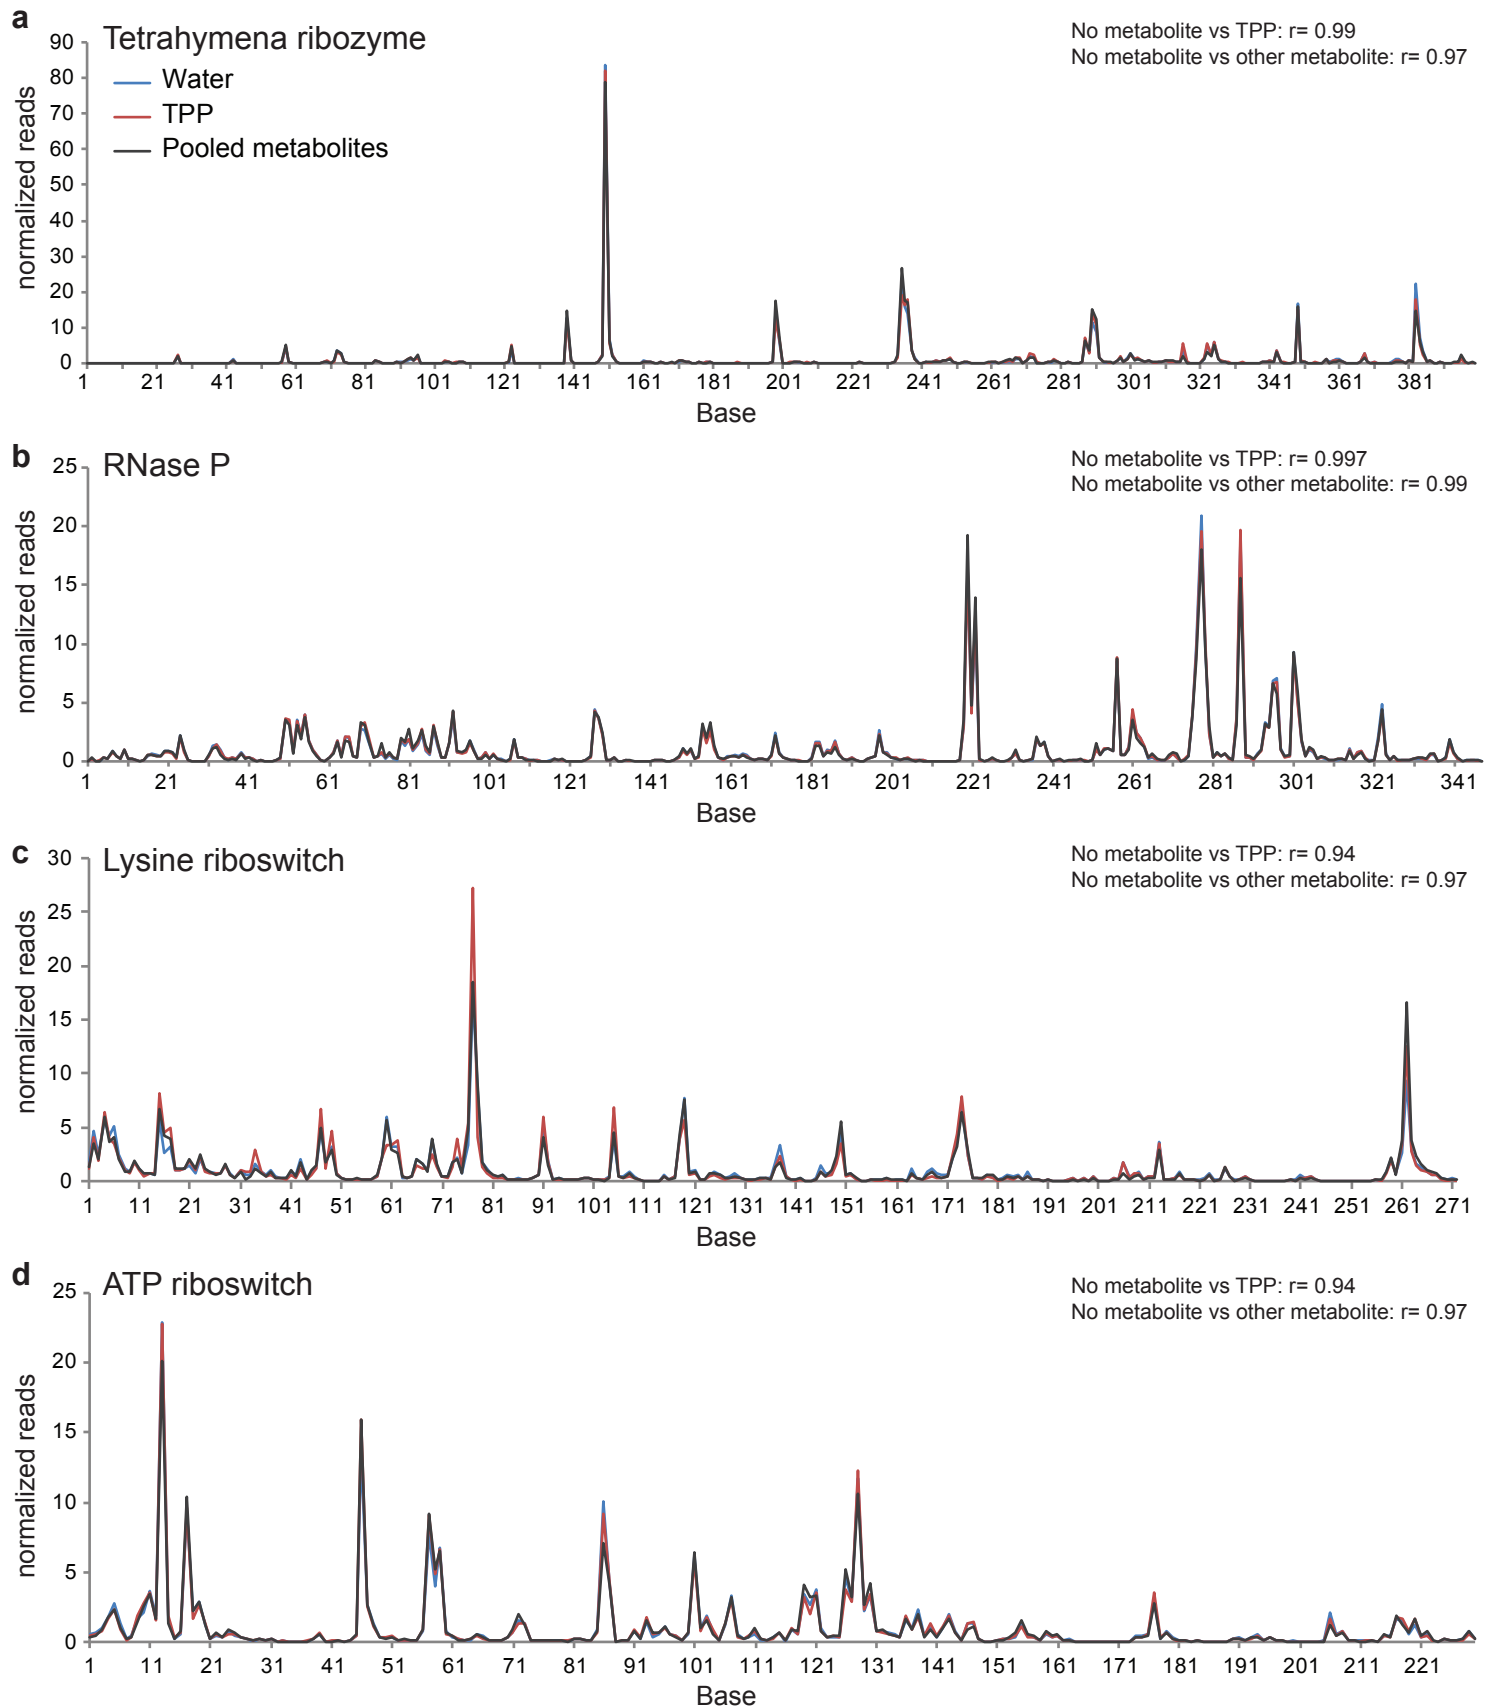

**Supplementary Figure 3. PARCEL does not detect structural changes in a set of negative controls.** a-d, Sequencing reads for negative controls that are doped into the PARCEL sequencing library. Tetrahymena ribozyme (a), *S. cerevisiae* RNase P (b), lysine riboswitch<sup>4</sup> (c), and ATP riboswitch (d) were structure probed with RNase V1 without metabolite (blue line), in the presence of 100  $\mu\text{M}$  TPP (red line) or a pool of five metabolites (SAM, glycine, lysine, FMN and AdoCbl, each 100  $\mu\text{M}$ ; black line). These RNAs are not observed to undergo structure changes in the presence of ligands (not known to bind to these RNAs), demonstrating PARCEL's specificity.



## Supplementary Figure 4

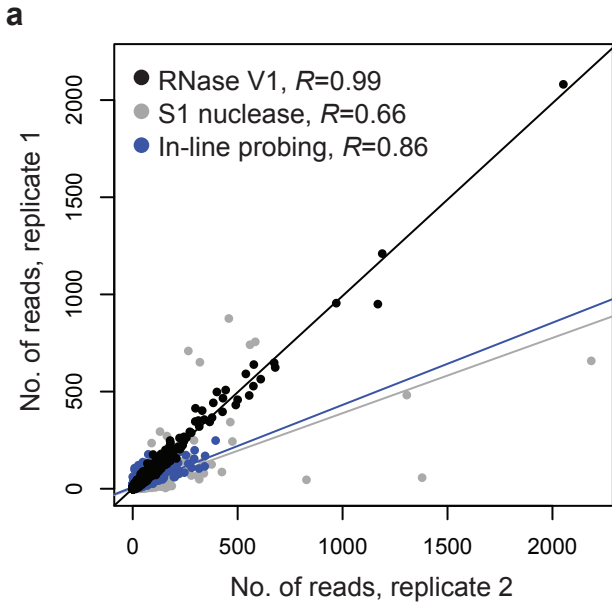

**Supplementary Figure 4. Computational analysis with the PARCEL pipeline.** **a**, Scatterplot of the number of deep sequencing reads that fall on each base along a transcript that is structure probed using RNase V1 (black dots), S1 nuclease (grey dots) or in-line probing (blue dots), for two biological replicates. RNase V1 sequencing libraries are most correlated between biological replicates. **b**, Schematic of the computational pipeline in PARCEL to identify RNA aptamers across different metabolites. As riboswitches are typically highly specific for their ligands, they should only undergo structural changes in the presence of their ligands, and not in the presence of other compounds with different structures. To identify RNA aptamers that bind to metabolite 1 specifically, we used libraries without metabolite, as well as libraries treated with different classes of metabolites (2 and 3 in the figure) as controls. RNA regions that only respond to metabolite 1, and not to other metabolites, are called out as potential RNA aptamers responding to 1 (red boxes). Details for steps 2, 3 and 4 can be found in the Methods section.

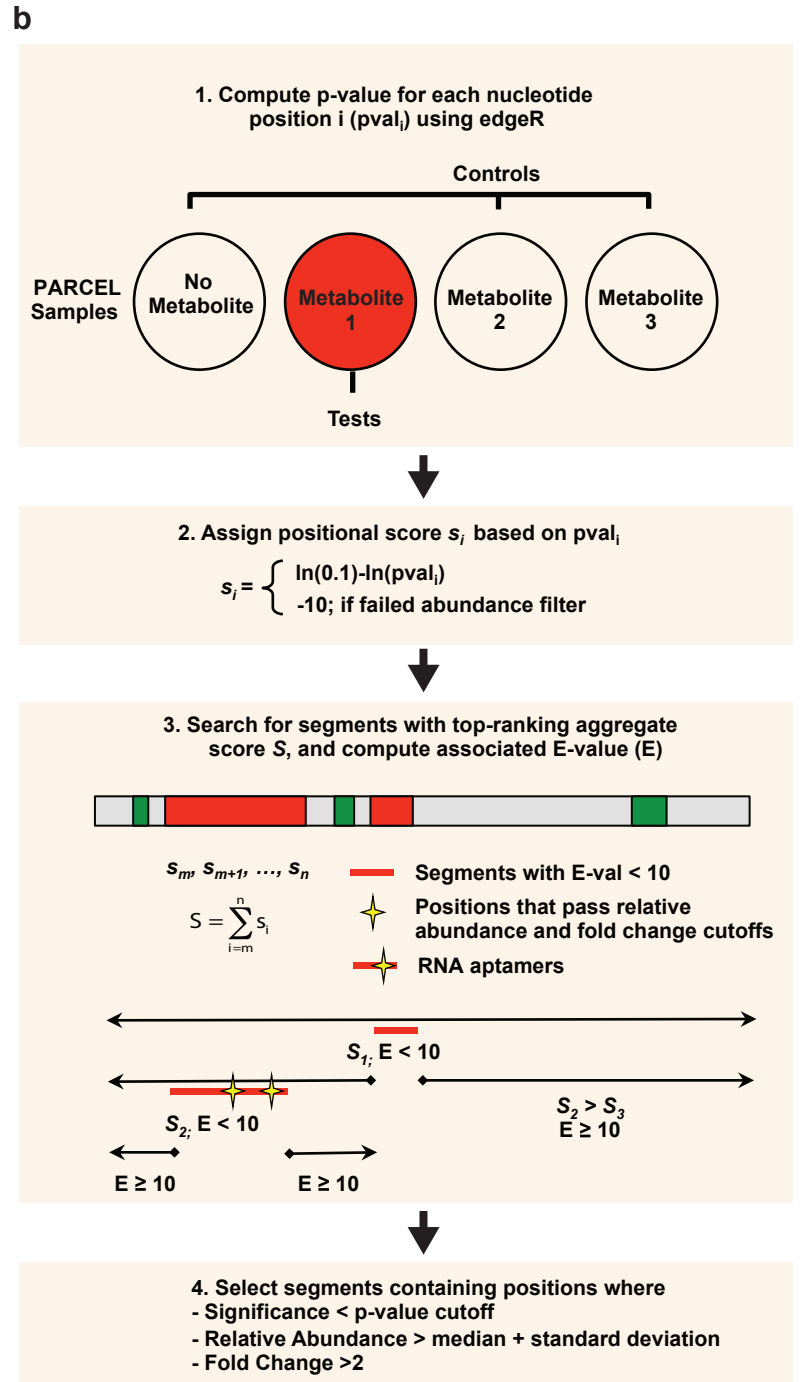

## Supplementary Figure 5

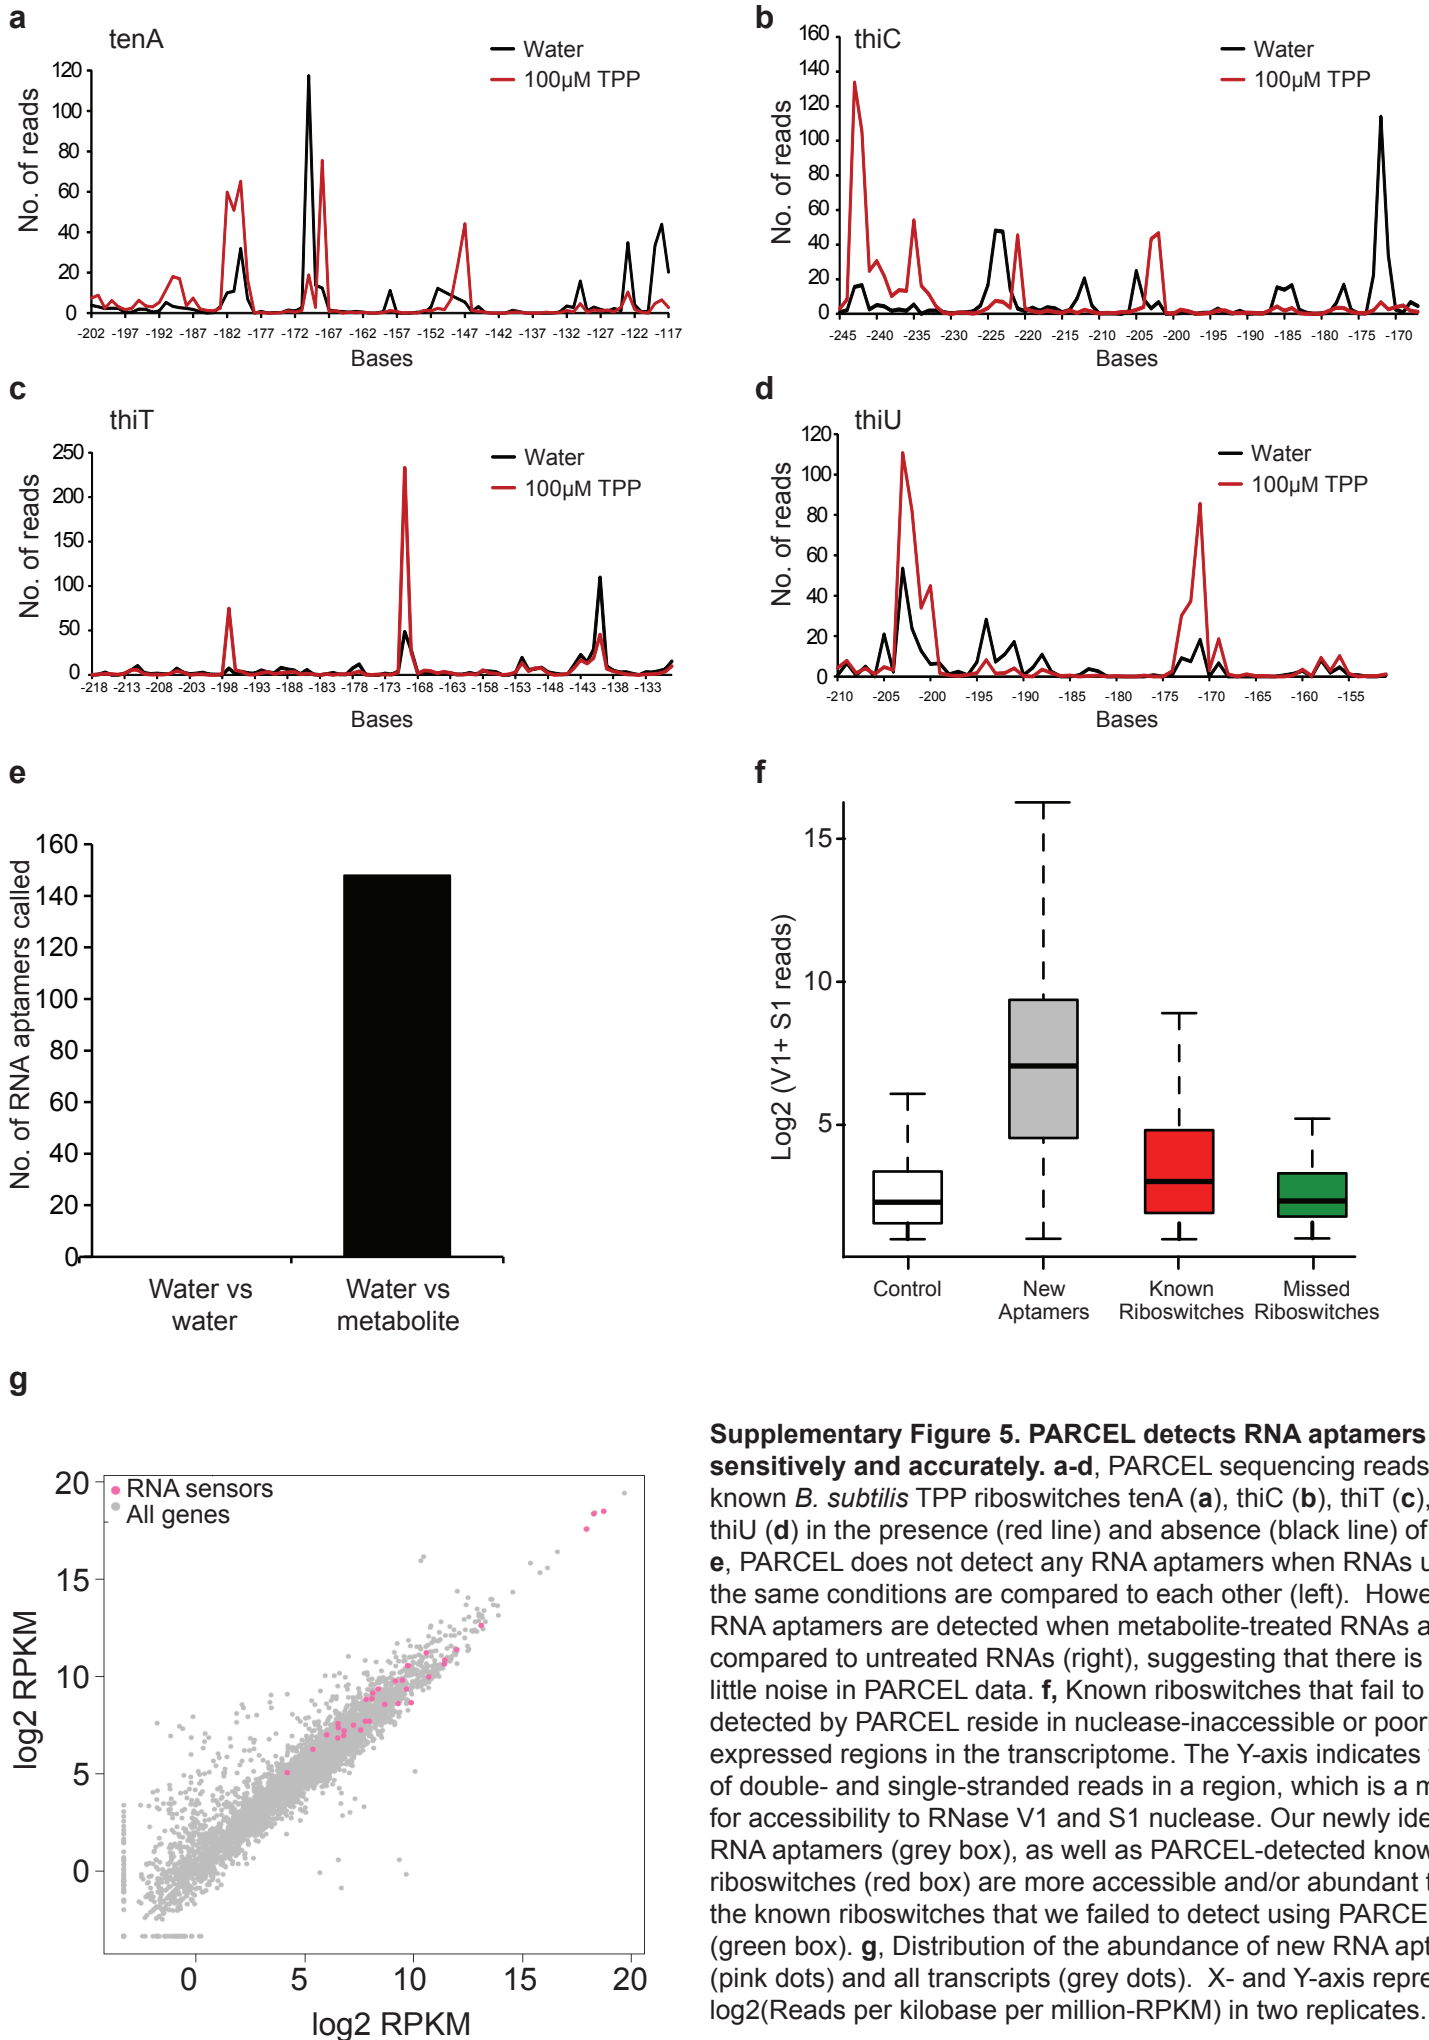

**Supplementary Figure 5. PARCEL detects RNA aptamers sensitively and accurately.** **a-d**, PARCEL sequencing reads for known *B. subtilis* TPP riboswitches *tenA* (**a**), *thiC* (**b**), *thiT* (**c**), and *thiU* (**d**) in the presence (red line) and absence (black line) of TPP<sup>5</sup>. **e**, PARCEL does not detect any RNA aptamers when RNAs under the same conditions are compared to each other (left). However, RNA aptamers are detected when metabolite-treated RNAs are compared to untreated RNAs (right), suggesting that there is very little noise in PARCEL data. **f**, Known riboswitches that fail to be detected by PARCEL reside in nuclease-inaccessible or poorly expressed regions in the transcriptome. The Y-axis indicates the sum of double- and single-stranded reads in a region, which is a measure for accessibility to RNase V1 and S1 nuclease. Our newly identified RNA aptamers (grey box), as well as PARCEL-detected known riboswitches (red box) are more accessible and/or abundant than the known riboswitches that we failed to detect using PARCEL (green box). **g**, Distribution of the abundance of new RNA aptamers (pink dots) and all transcripts (grey dots). X- and Y-axis represent log<sub>2</sub>(Reads per kilobase per million-RPKM) in two replicates.

## Supplementary Figure 6

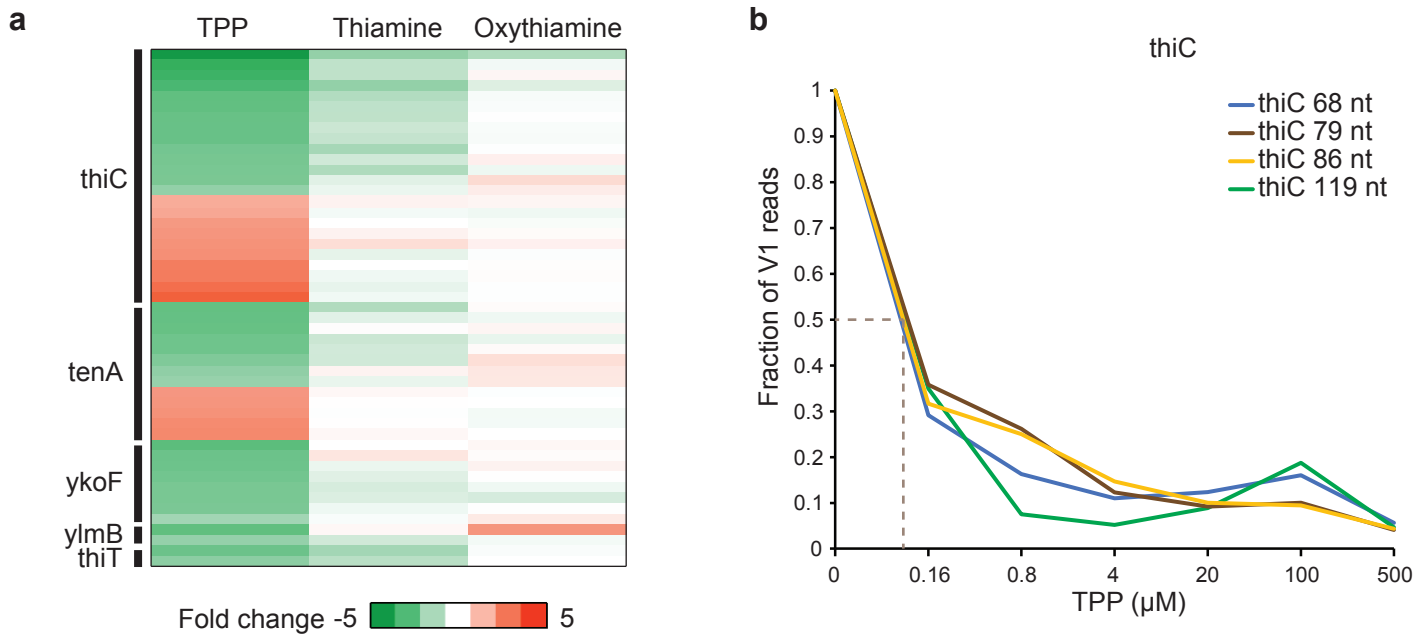

**Supplementary Figure 6. PARCEL is quantitative in its measurements. a**, PARCEL data for all five TPP riboswitches in *B. subtilis*. Each row indicates a position along an RNA that showed structural change. Red and green bars indicate increase or decrease in structuredness in the presence of metabolite respectively. All five TPP riboswitches exhibit the strongest structure change in the presence of TPP, followed by thiamine and oxythiamine. **b**, Plot showing how bases in the thiC riboswitch change structure (Y-axis: number of V1 reads at each base, normalized to sequencing depth) under increasing concentrations of TPP (X-axis). The grey dotted line indicates the  $K_D$  (110 nM) at half maximal point of structural change.

## Supplementary Figure 7

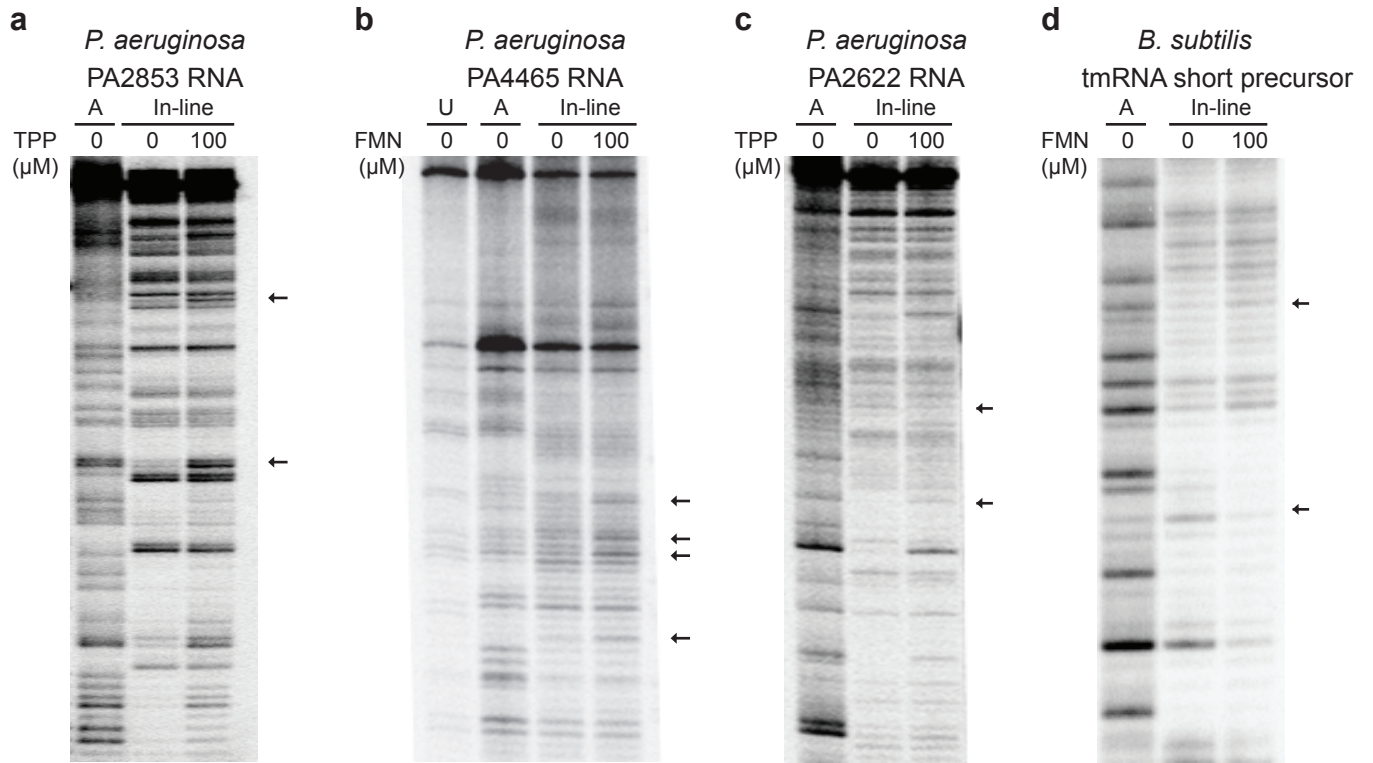

**Supplementary Figure 7. Validation of new bacterial aptamers by in-line probing.** a-d, Gel images of in-line probing performed on cloned and *in-vitro* transcribed TPP-responsive (a, c) and FMN-responsive (b, d) RNA aptamers found in *P. aeruginosa* and *B. subtilis* using PARCEL. Black arrows indicate regions of structural change in the presence of metabolite. Also shown are A ladder (A lane) and untreated full length RNA (U lane).

## Supplementary Figure 8

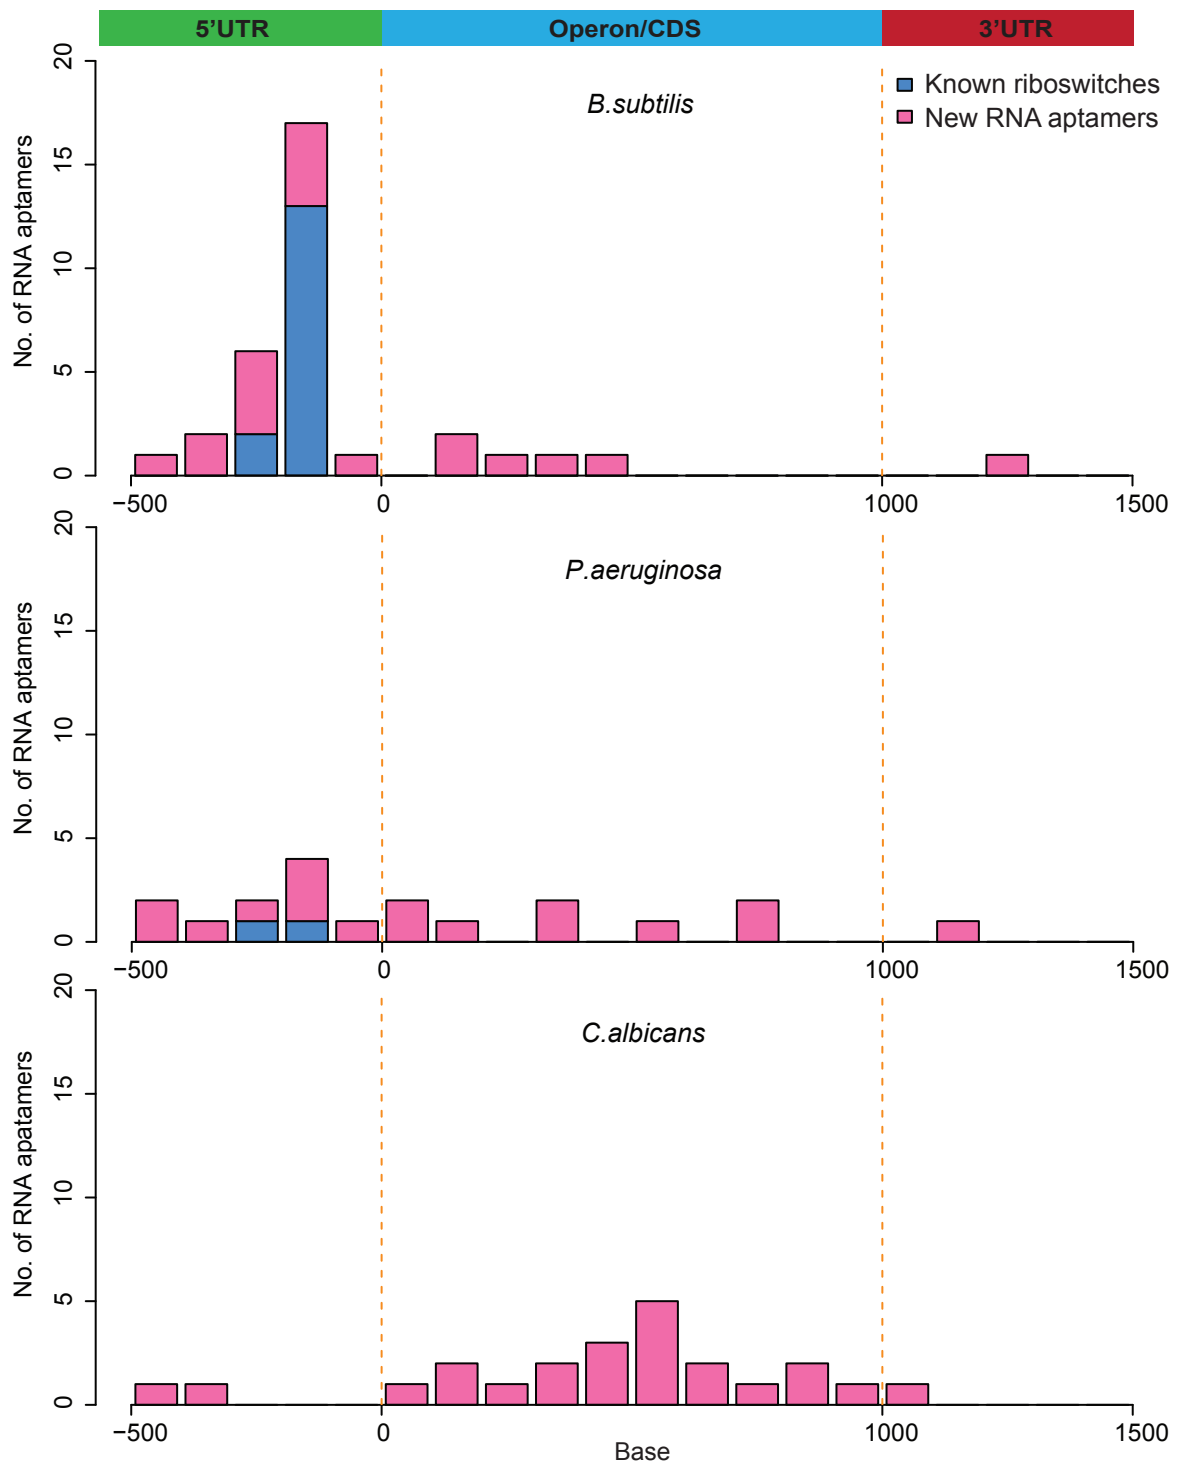

**Supplementary Figure 8. Genomic locations of new RNA aptamers.** Distribution of detected RNA aptamers upstream, downstream and within operons in *B. subtilis* (top), *P. aeruginosa* (middle), and in 5' UTRs, CDSs, and 3' UTRs in *C. albicans* (bottom). Y-axis indicates the number of aptamers that fall within each location. X-axis indicates the bases along the transcript. The blue and pink bars indicate the distribution of known riboswitches and new RNA aptamers respectively.

## Supplementary Figure 9

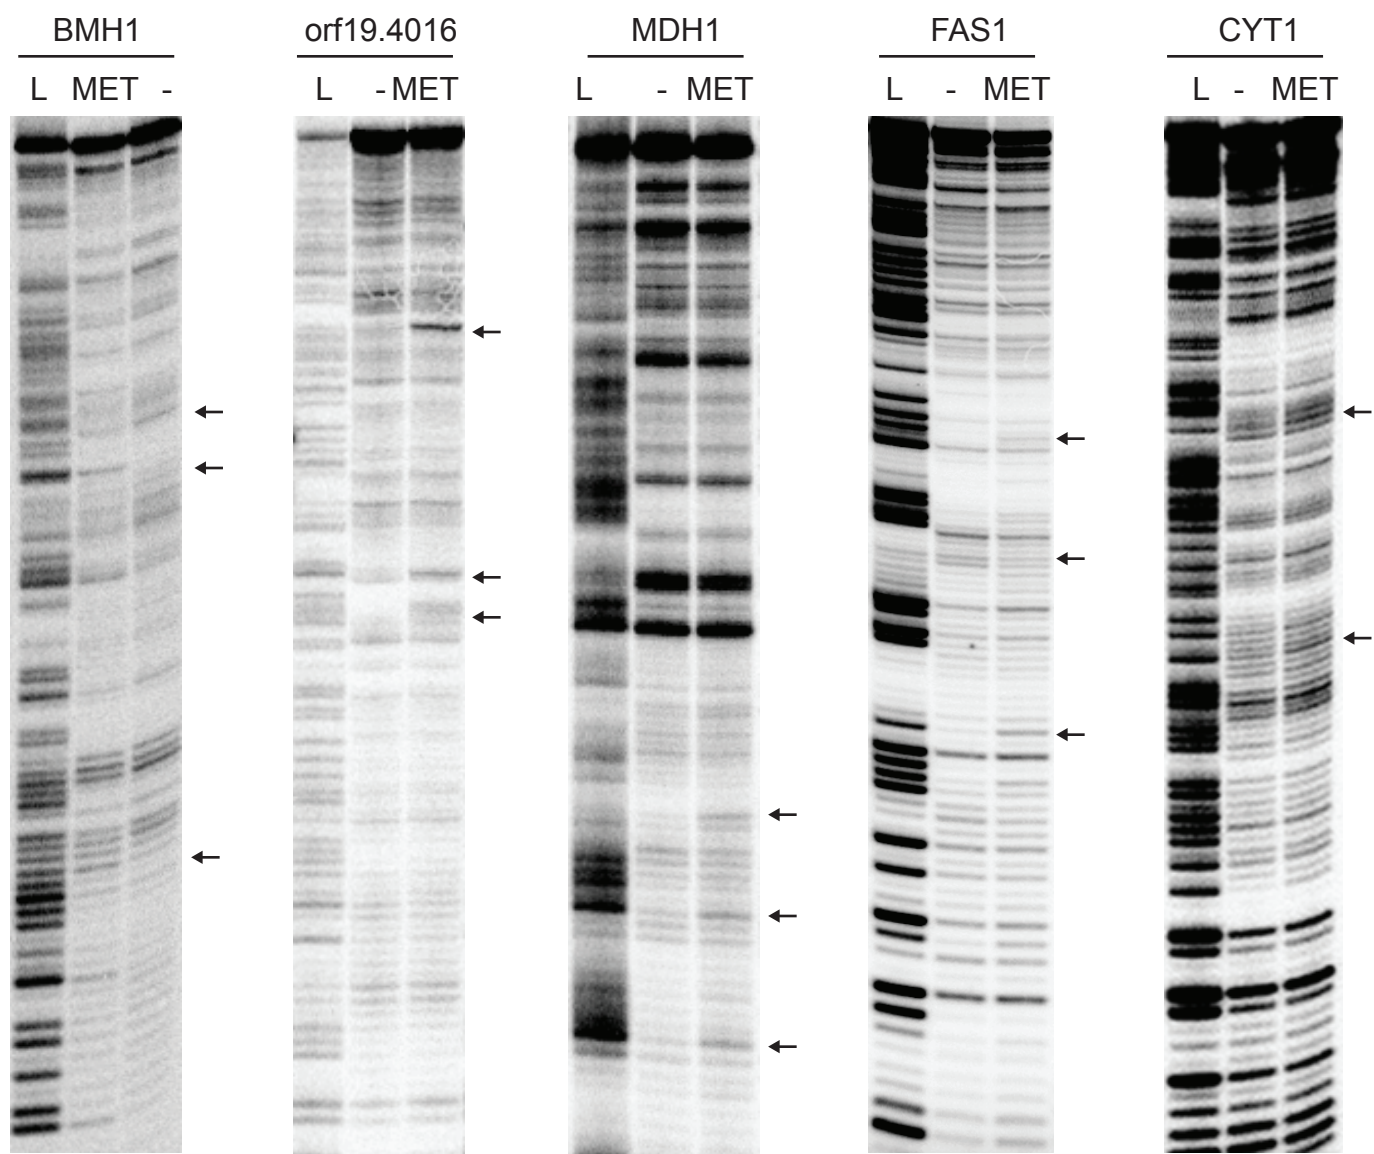

**Supplementary Figure 9. Validation of *Candida albicans* RNA aptamers by in-line probing.** Gel images of in-line probing reactions performed on cloned and *in-vitro* transcribed RNA aptamers found in *C. albicans* by PARCEL. BMH1 RNA was structured probed in the presence (lane 2) and absence (lane 3) of a pool of five metabolites (SAM, glycine, lysine, FMN and AdoCbl, each 100 μM). orf19.4016, MDH1, FAS1, CYT1 RNAs are structured probed in the presence (lane 3) and absence (lane 2) of a pool of five metabolites (SAM, glycine, lysine, FMN and AdoCbl, each 100 μM). The A ladder is also shown (lane 1). Black arrows indicate regions of structure change in the presence of metabolites.



## Supplementary Figure 10

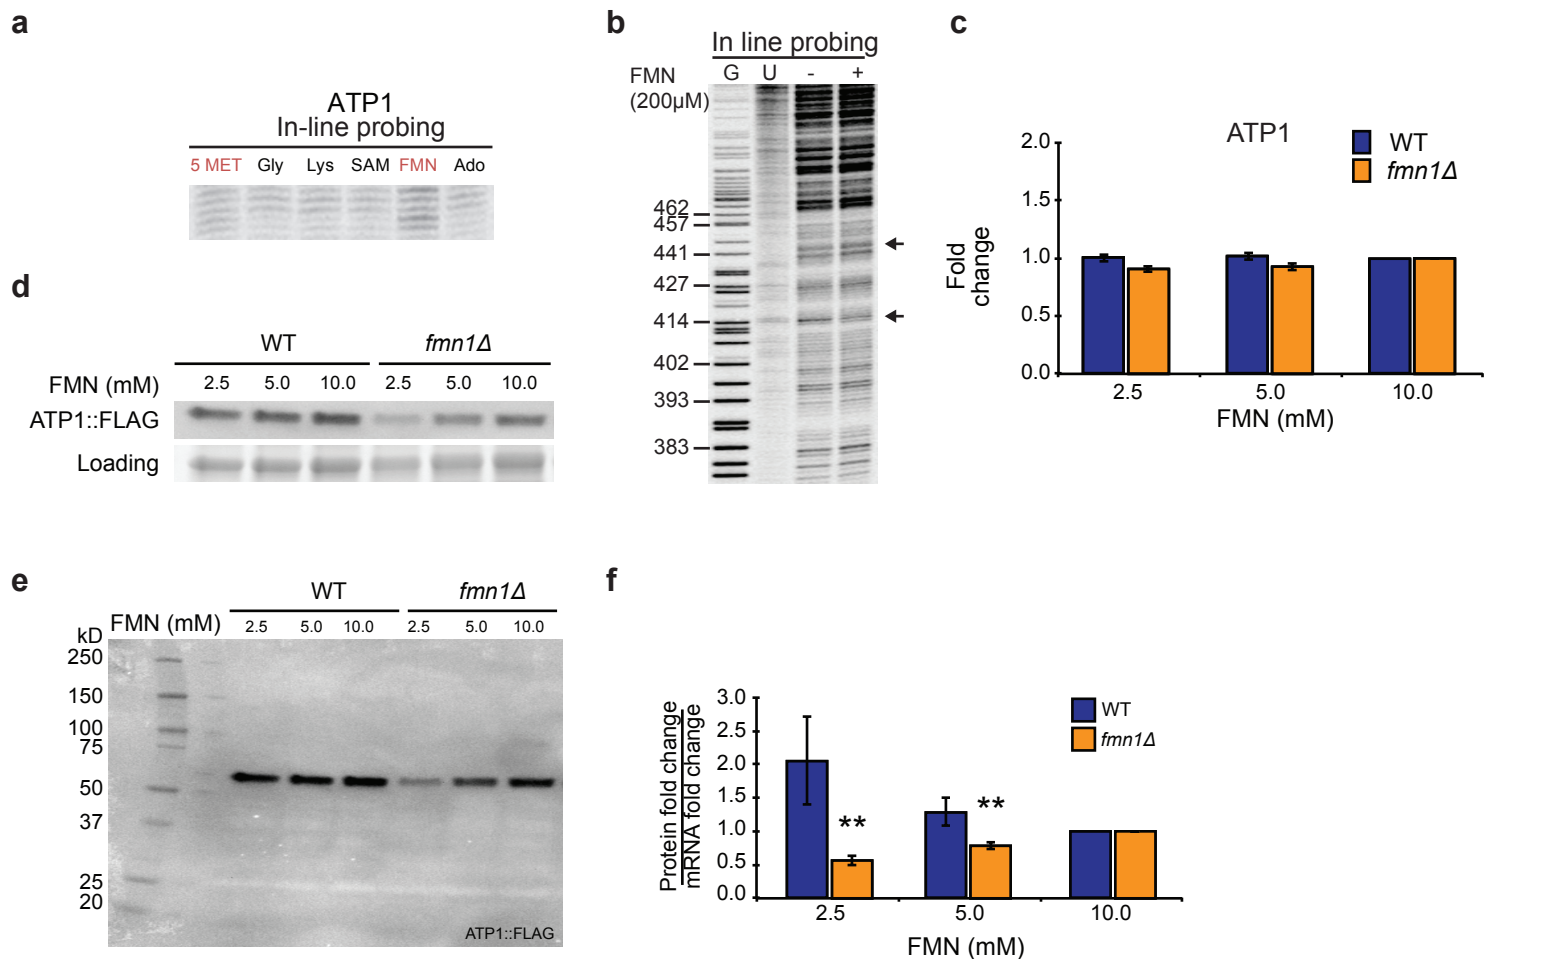

**Supplementary Figure 10. Validation of *C. albicans* RNA sensor, ATP1.** **a**, Gel images showing In-line probing of ATP1 mRNA in the presence of all 5 metabolites as a pool (Lane 1, 5 MET), 100μM glycine (Lane 2, gly), 100μM lysine (Lane 3, lys), 100μM SAM (Lane 4), 100μM FMN (Lane 5), and 100μM Adocbl (Lane 6, Ado). **b**, Gel image of in-line probing reactions performed with *in vitro* transcribed and radiolabelled ATP1 RNA in the presence (lane 4) and absence (lane 3) of 200μM FMN. Also shown are the uncut RNA (lane 2) and G ladder (lane 1). Black arrows indicate regions of structure changes. **c**, Average normalized relative fold change (fc) levels of ATP1 mRNA (y-axis) were plotted against FMN concentrations (x-axis, mM). The blue and orange bars represent data from ATP1::FLAG knock-in strains with wildtype (WT) and deletion (*fmn1Δ*) backgrounds, respectively. The normalized relative fc levels were determined by first normalizing to actin (ACT1), and then to respective strain cultured at 10 mM FMN (fc = 1). The average and standard error (+/- error bar) were calculated from seven experiments. **d, e**, A representative Western blot showing ATP1::FLAG (top) and loading (bottom) protein levels in ATP1::FLAG knock-in strains with WT (left) and *fmn1Δ* (right) backgrounds cultured at different FMN concentrations (mM). Using t-test (n=7), significant *p*-values of 0.0003 and 0.001 (for 2.5 and 5.0 mM against 10.0 mM respectively) were determined for *fmn1Δ*, but not WT (*p*-values of 0.2 and 0.3). **f**, Average normalized (relative protein fc / relative mRNA fc) levels of ATP1::FLAG (y-axis) were plotted against FMN concentrations (x-axis, mM). The blue and orange bars represent data from ATP1::FLAG knock-in strains with WT and *fmn1Δ* backgrounds respectively. The relative protein fold changes were determined by normalizing to loading (non-specific band), whereas relative mRNA fold-changes were determined by normalizing to actin (ACT1). These values were then normalized to respective strain cultured at 10 mM FMN (fc = 1). The average and standard error (+/- error bar) were calculated from seven experiments. \*\* indicate significant *p*-values <0.01 (0.0006 and 0.004 for 2.5 mM and 5.0 mM respectively), as determined by t-test. WT *p*-values were 0.2 for both 2.5 mM and 5.0 mM FMN.

## Supplementary Figure 11

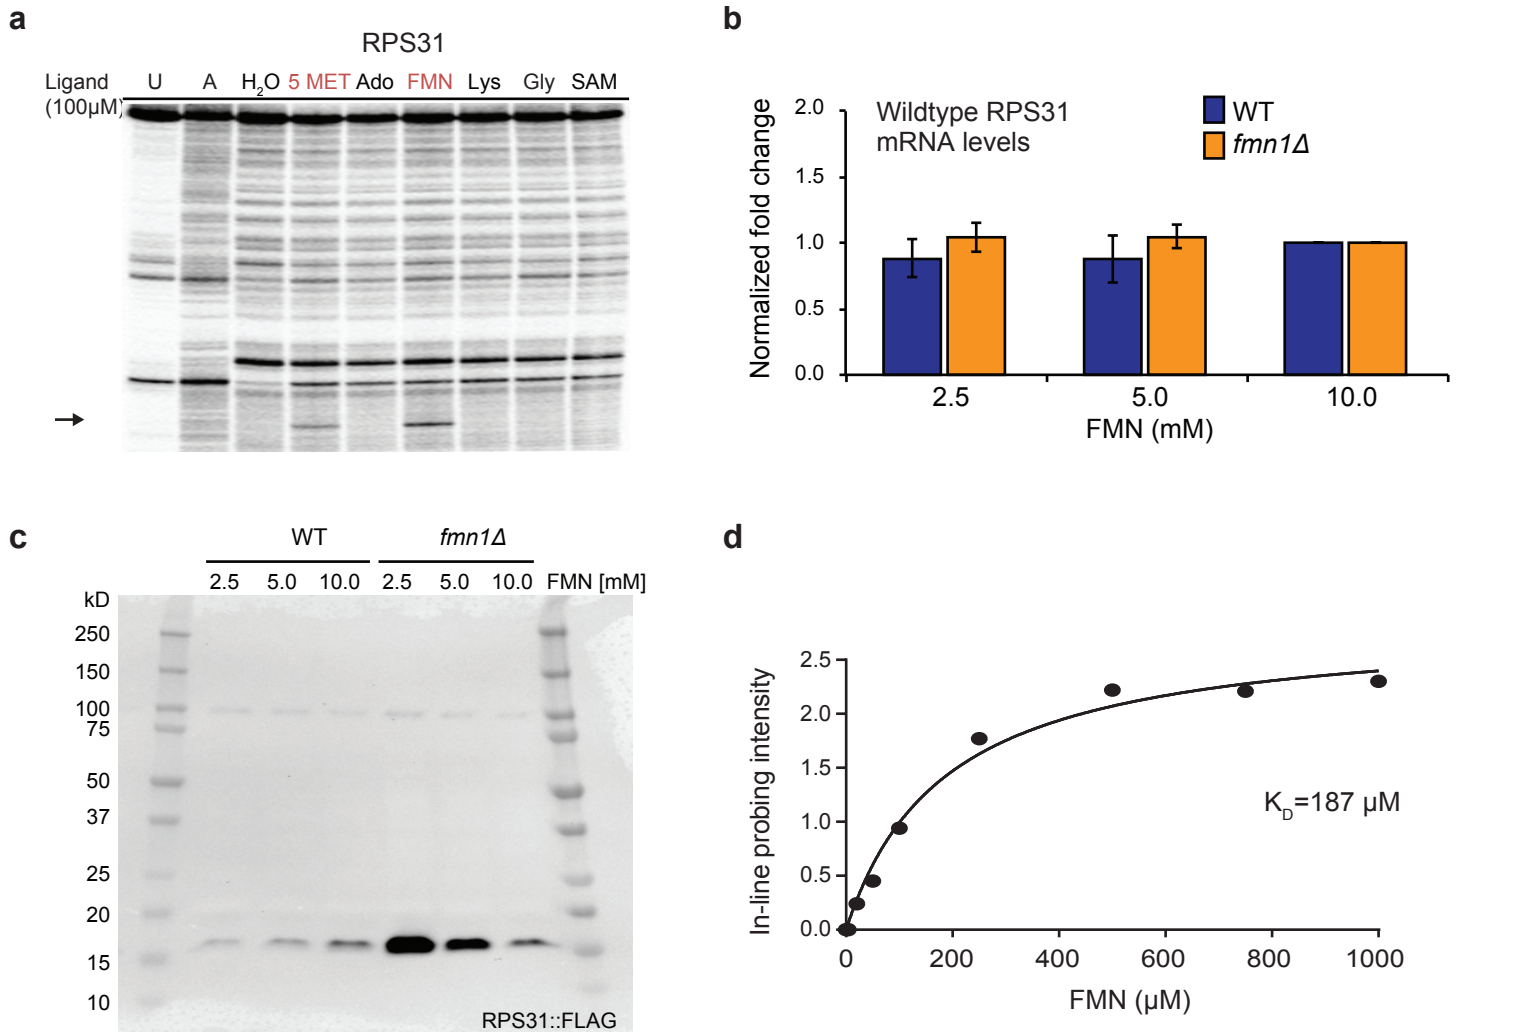

**Supplementary Figure 11. Validation of *C. albicans* RNA sensor, RPS31.** **a**, In-line probing of RPS31 RNA using a radiolabeled primer in the absence (Water, lane 3) and presence of all 5 metabolites as a pool (Lane 4, 5 MET), Adocbl (Lane 5, Ado), FMN (Lane 6), lysine (Lane 7, lys), glycine (Lane 8, gly), and SAM (Lane 9). Also shown are uncut RNA (lane 1) and A ladder (lane 2). The black arrow indicates a base that changes structure in the presence of FMN. **b**, Average normalized relative fold change (fc) levels of RPS31 mRNA (y-axis) were plotted against FMN concentrations (x-axis, mM). The blue and orange bars represent data from RPS31::FLAG knock-in strains with wildtype (WT) and deletion (*fmn1* $\Delta$ ) backgrounds respectively. The normalized relative fc levels were determined by first normalizing to actin (ACT1), and then to respective strain cultured at 10 mM FMN (fc = 1). The average and standard error ( $\pm$  error bar) were calculated from eight experiments. **c**, Uncropped western blot image of Figure 4e, showing RPS31 protein levels change under different concentrations of FMN. **d**, Plot showing the intensity of in-line probing band with increasing concentration of FMN. The  $K_D$  of binding is estimated to be 187  $\mu$ M based on a best-fit curve using non-linear regression. We used the parameters for single site binding to saturation in the program Prism.



## Supplementary Figure 12

**a**

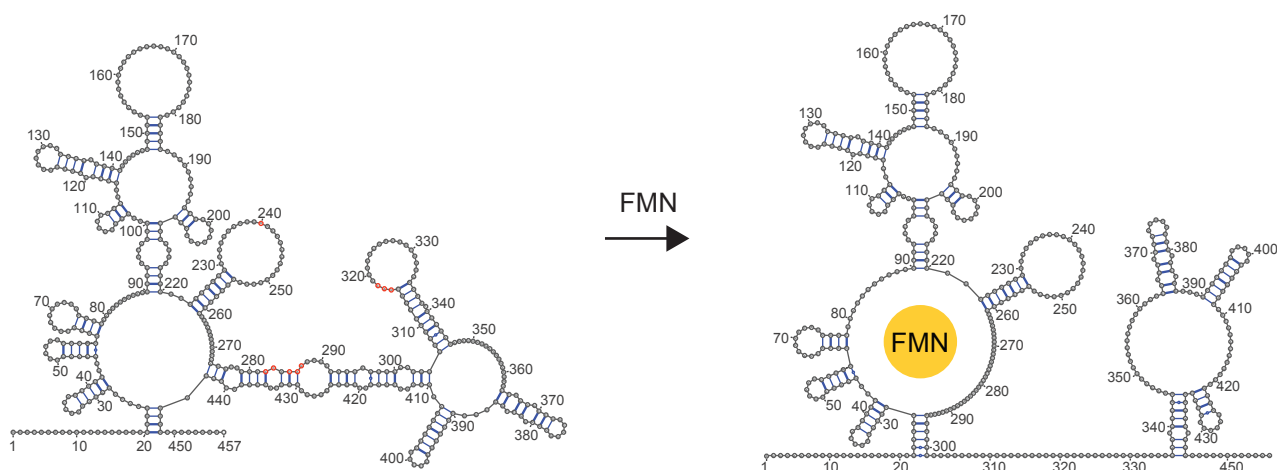

**b**

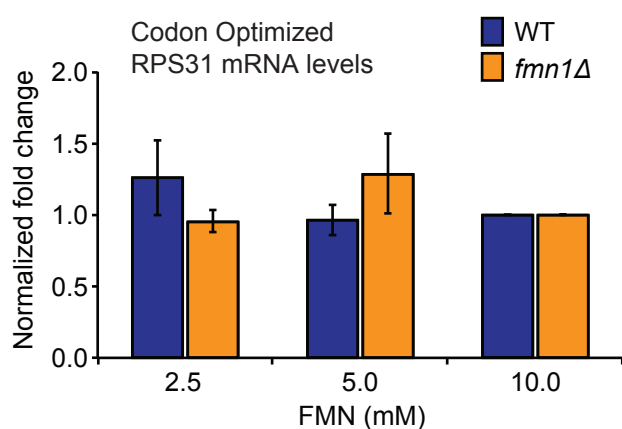

**c**

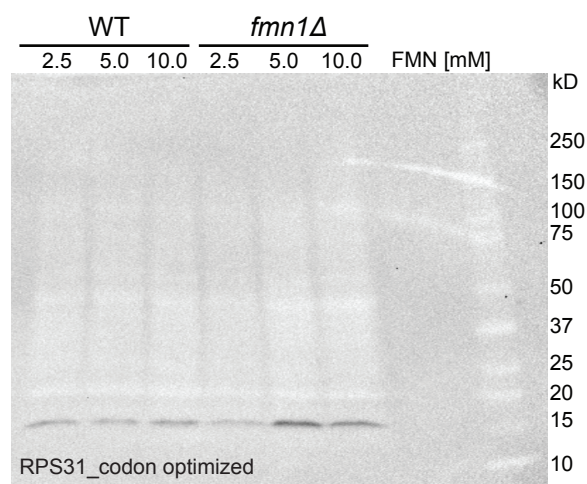

**d**

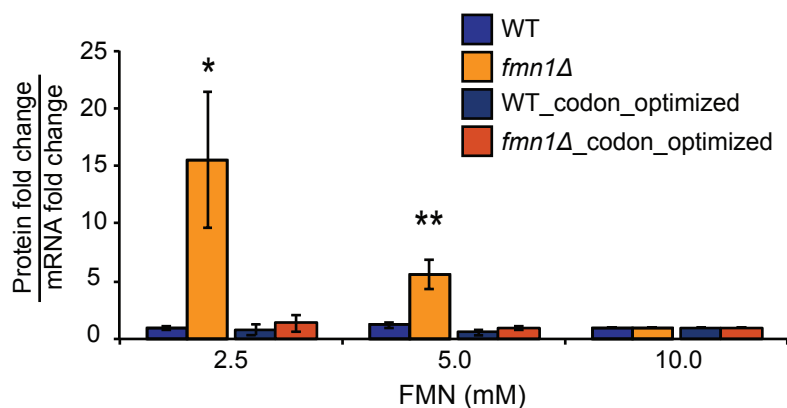

**Supplementary Figure 12. a**, Secondary structure models of the free (left) and FMN bound (right) RPS31 mRNA using RNase V1, S1, SHAPE and in-line probing signals as constraints in the program RNAfold. The red bases indicate positions that became more single-stranded, upon ligand binding, in our footprinting analysis. **b**, Average normalized relative fold change (fc) levels of codon-optimized RPS31 (co\_RPS31) mRNA (y-axis) were plotted against FMN concentrations (x-axis, mM). The blue and orange bars represent data from co\_RPS31::FLAG knock-in strains with WT and *fmn1Δ* backgrounds respectively. The normalized relative fc levels were determined by first normalizing to actin (ACT1), and then to respective strain cultured at 10 mM FMN (fc = 1). The average and standard error (+/- error bar) were calculated from three experiments. **c**, Uncropped western blot image of codon optimized RPS31::FLAG in the presence of different concentrations of FMN (**Figure 4h**). **d**, Average normalized (relative protein fc / relative mRNA fc) levels of RPS31::FLAG (y-axis) were plotted against FMN concentrations (x-axis, mM). The blue and orange bars represent data from RPS31::FLAG knock-in strains with WT and *fmn1Δ* backgrounds respectively, while the dark blue and red bars represent data from co\_RPS31::FLAG knock-in strains with WT and *fmn1Δ* backgrounds respectively. The relative protein fold changes were determined by normalizing to loading (non-specific band), whereas relative mRNA fold changes were determined by normalizing to actin (ACT1). These values were then normalized to respective strain cultured at 10 mM FMN (fc = 1). The average and standard error (+/- error bar) were calculated from at least three experiments. \* and \*\* indicate significant *p*-values <0.05 (0.04 for 2.5 mM FMN) and <0.01 (0.009 for 5.0 mM FMN) respectively, as determined by t-test. *P*-values for co\_RPS31::FLAG knock-in strains were not significant (between 0.2 and 0.8).

Supplementary Table 1

Supplementary Table1. Mapping Statistics of PARCEL libraries

| Species      | Condition           | Replicates | Sequenced | With Adapter | After adapter Trimmed | Mapped  | Uniquely Mapped | Mappability (%) |
|--------------|---------------------|------------|-----------|--------------|-----------------------|---------|-----------------|-----------------|
| B.subtilis   | fad                 | rep1       | 10833015  | 8322162      | 7356648               | 5231848 | 4983216         | 71.12           |
| B.subtilis   | fad                 | rep2       | 10447817  | 8597632      | 6549922               | 4781118 | 4545679         | 73.00           |
| B.subtilis   | sam                 | rep1       | 11430669  | 9037182      | 7814019               | 5464075 | 5200934         | 69.93           |
| B.subtilis   | sam                 | rep2       | 10521498  | 8514137      | 6504582               | 4883165 | 4656615         | 75.07           |
| B.subtilis   | water               | rep1       | 10871016  | 6912432      | 7820288               | 5546480 | 5302016         | 70.92           |
| B.subtilis   | water               | rep2       | 10598006  | 7387124      | 7170237               | 5213999 | 4961003         | 72.72           |
| B.subtilis   | fmn                 | rep1       | 3508089   | 1956891      | 2698306               | 2344049 | 2264024         | 86.87           |
| B.subtilis   | fmn                 | rep2       | 2799587   | 1598995      | 1773163               | 1531226 | 1484117         | 86.36           |
| B.subtilis   | tpp                 | rep1       | 9128018   | 6101418      | 5966587               | 5397650 | 5203978         | 90.46           |
| B.subtilis   | tpp                 | rep2       | 5942019   | 3608533      | 3269960               | 3012528 | 2944283         | 92.13           |
| B.subtilis   | water               | rep1       | 9566093   | 6047195      | 5749303               | 5228163 | 5047189         | 90.94           |
| B.subtilis   | water               | rep2       | 7623405   | 4618343      | 5010175               | 4547478 | 4403194         | 90.76           |
| C.albicans   | pool of metabolites | rep1       | 95399843  | 44315134     | 83524057              | 3.4E+07 | 32698144        | 41.02           |
| C.albicans   | pool of metabolites | rep2       | 105480861 | 51841834     | 95012910              | 4.3E+07 | 40843361        | 45.03           |
| C.albicans   | tpp                 | rep1       | 118986513 | 44269951     | 108190741             | 4.8E+07 | 45972371        | 44.48           |
| C.albicans   | tpp                 | rep2       | 136255424 | 71921380     | 116472194             | 5.5E+07 | 52046672        | 46.83           |
| C.albicans   | water               | rep1       | 99743550  | 45756969     | 90135506              | 4.1E+07 | 38949194        | 45.29           |
| C.albicans   | water               | rep2       | 99413312  | 47944576     | 79783124              | 3.9E+07 | 37369447        | 49.41           |
| P.aeruginosa | fmn                 | rep1       | 10790637  | 6836390      | 6457721               | 5096640 | 4963238         | 78.92           |
| P.aeruginosa | fmn                 | rep2       | 11487412  | 7259000      | 6984632               | 5663270 | 5508889         | 81.08           |
| P.aeruginosa | tpp                 | rep1       | 9295428   | 4251067      | 5997412               | 5064108 | 4988672         | 84.44           |
| P.aeruginosa | tpp                 | rep2       | 9810404   | 6698194      | 4544656               | 3726769 | 3649732         | 82.00           |
| P.aeruginosa | water               | rep1       | 10722458  | 5048775      | 8642005               | 7227862 | 7055499         | 83.64           |
| P.aeruginosa | water               | rep2       | 11325037  | 4958754      | 7919815               | 6588814 | 6360793         | 83.19           |

Supplementary Figure 2. List of RNA aptamers found in prokaryotes

| Species      | Ligand | Genomic Region            | Locus Name      | Biotype              | Closest Gene | Region Type | Known | Fold change | E-value   |
|--------------|--------|---------------------------|-----------------|----------------------|--------------|-------------|-------|-------------|-----------|
| B.subtilis   | sam    | NC_000964:1180679-1180906 | BSU_misc_RNA_12 | processed_transcript | BSU11010     | 5UTR        | Yes   | 9.11        | 0.00E+00  |
| B.subtilis   | fmn    | NC_000964:1180711-1180734 | BSU_misc_RNA_12 | processed_transcript | BSU11010     | 5UTR        | No    | 2.01        | 1.34E-24  |
| B.subtilis   | fmn    | NC_000964:1219266-1219277 | BSU_misc_RNA_13 | processed_transcript | BSU11420     | 5UTR        | No    | 2.17        | 2.97E-03  |
| B.subtilis   | tpp    | NC_000964:1242243-1242372 | BSU_misc_RNA_14 | processed_transcript | BSU11650     | 5UTR        | Yes   | 16.50       | 1.39E-38  |
| B.subtilis   | sam    | NC_000964:1258281-1258426 | BSU_misc_RNA_15 | processed_transcript | BSU11870     | 5UTR        | Yes   | 65.83       | 9.97E-06  |
| B.subtilis   | sam    | NC_000964:126665-126666   | rpoC            | protein_coding       | BSU01080     | CDS         | No    | 2.24        | 1.68E+00  |
| B.subtilis   | fmn    | NC_000964:133423-133477   | tufA            | protein_coding       | BSU01130     | CDS         | No    | 2.54        | 2.77E-45  |
| B.subtilis   | fmn    | NC_000964:137444-137449   | rplB            | protein_coding       | BSU01190     | CDS         | No    | 3.87        | 2.00E-02  |
| B.subtilis   | sam    | NC_000964:1385725-1386012 | BSU_misc_RNA_18 | processed_transcript | BSU13180     | 5UTR        | Yes   | 80.50       | 8.07E-138 |
| B.subtilis   | tpp    | NC_000964:1391738-1391852 | BSU_misc_RNA_19 | processed_transcript | BSU13240     | 5UTR        | Yes   | 24.15       | 9.15E-63  |
| B.subtilis   | fmn    | NC_000964:139912-139942   | rplP            | protein_coding       | BSU01240     | 5UTR        | No    | 3.65        | 9.86E-14  |
| B.subtilis   | sam    | NC_000964:1424526-1424710 | BSU_misc_RNA_20 | processed_transcript | BSU13560     | 5UTR        | Yes   | 19.76       | 5.85E-28  |
| B.subtilis   | sam    | NC_000964:1426865-1426978 | BSU_misc_RNA_21 | processed_transcript | BSU13590     | 5UTR        | Yes   | 66.60       | 1.18E-13  |
| B.subtilis   | fmn    | NC_000964:1459076-1459081 | ptsG            | protein_coding       | BSU13900     | 5UTR        | No    | 2.01        | 5.23E-02  |
| B.subtilis   | sam    | NC_000964:1524309-1524316 | rnjA            | protein_coding       | BSU14530     | CDS         | No    | 7.49        | 6.11E-02  |
| B.subtilis   | fmn    | NC_000964:1673762-1673768 | rpsP            | protein_coding       | BSU16000     | 5UTR        | No    | 5.05        | 1.02E+00  |
| B.subtilis   | sam    | NC_000964:2025159-2025252 | BSU_misc_RNA_31 | processed_transcript | BSU18560     | 5UTR        | Yes   | 23.44       | 1.80E+00  |
| B.subtilis   | fmn    | NC_000964:2070018-2070025 | NA              | NA                   | BSU18980     | 3UTR        | No    | 3.09        | 3.12E-02  |
| B.subtilis   | sam    | NC_000964:2394851-2394856 | rpsA            | protein_coding       | BSU22870     | 5UTR        | No    | 2.25        | 9.09E+00  |
| B.subtilis   | fmn    | NC_000964:2410608-2410899 | ypzE            | protein_coding       | BSU23050     | 5UTR        | Yes   | 163.95      | 9.53E-08  |
| B.subtilis   | fmn    | NC_000964:2431328-2431560 | BSU_misc_RNA_36 | processed_transcript | BSU23280     | 5UTR        | Yes   | 8.95        | 1.53E-52  |
| B.subtilis   | sam    | NC_000964:2431541-2431548 | BSU_misc_RNA_36 | processed_transcript | BSU23280     | 5UTR        | No    | 2.85        | 1.50E-02  |
| B.subtilis   | fmn    | NC_000964:26464-26619     | scr             | processed_transcript | BSU00190     | 5UTR        | No    | 2.38        | 2.14E-218 |
| B.subtilis   | fmn    | NC_000964:2814509-2814515 | BSU_misc_RNA_41 | processed_transcript | BSU27540     | 5UTR        | No    | 9.11        | 5.51E-03  |
| B.subtilis   | sam    | NC_000964:3129194-3129334 | BSU_misc_RNA_50 | processed_transcript | BSU30550     | 5UTR        | Yes   | 8.01        | 1.41E-12  |
| B.subtilis   | tpp    | NC_000964:3179105-3179208 | BSU_misc_RNA_51 | processed_transcript | BSU30990     | 5UTR        | Yes   | 6.77        | 1.76E-03  |
| B.subtilis   | sam    | NC_000964:3358682-3358695 | sufD            | protein_coding       | BSU32690     | 5UTR        | No    | 4.51        | 6.99E-05  |
| B.subtilis   | sam    | NC_000964:3364396-3364504 | BSU_misc_RNA_53 | processed_transcript | BSU32750     | 5UTR        | Yes   | 5.54        | 9.88E-02  |
| B.subtilis   | fmn    | NC_000964:3450741-3451095 | ssrA            | tmRNA                | BSU33600     | 5UTR        | No    | 9.00        | 7.72E-66  |
| B.subtilis   | tpp    | NC_000964:3450955-3450985 | ssrA            | tmRNA                | BSU33590     | 5UTR        | No    | 2.33        | 1.32E-18  |
| B.subtilis   | sam    | NC_000964:3999147-3999274 | BSU_misc_RNA_62 | processed_transcript | BSU38960     | 5UTR        | Yes   | 22.07       | 2.81E-03  |
| B.subtilis   | sam    | NC_000964:4156515-4156516 | purA            | protein_coding       | BSU40420     | CDS         | No    | 2.62        | 1.20E+00  |
| B.subtilis   | tpp    | NC_000964:955647-955764   | BSU_misc_RNA_11 | processed_transcript | BSU08790     | 5UTR        | Yes   | 24.51       | 5.75E-113 |
| P.aeruginosa | tpp    | NC_002516:2965124-2965125 | NA              | NA                   | PA2622       | 5UTR        | No    | 4.13        | 3.45E+00  |
| P.aeruginosa | tpp    | NC_002516:2966734-2966740 | icd             | protein_coding       | PA2623       | CDS         | No    | 7.76        | 3.56E-02  |
| P.aeruginosa | tpp    | NC_002516:3119316-3119328 | NA              | NA                   | PA2758       | 3UTR        | No    | 5.09        | 4.30E-18  |

|              |     |                           |          |                |        |      |     |        |          |
|--------------|-----|---------------------------|----------|----------------|--------|------|-----|--------|----------|
| P.aeruginosa | tpp | NC_002516:3207100-3207119 | oprI     | protein_coding | PA2853 | CDS  | No  | 2.23   | 2.06E-07 |
| P.aeruginosa | fmn | NC_002516:4536676-4536861 | NA       | NA             | PA4055 | 5UTR | Yes | 31.58  | 3.91E-24 |
| P.aeruginosa | tpp | NC_002516:4754571-4754577 | rpoA     | protein_coding | PA4237 | 5UTR | No  | 4.19   | 4.39E-02 |
| P.aeruginosa | tpp | NC_002516:4770822-4770823 | fusA1    | protein_coding | PA4266 | CDS  | No  | 4.60   | 3.67E+00 |
| P.aeruginosa | tpp | NC_002516:4782402-4782409 | rplA     | protein_coding | PA4273 | CDS  | No  | 19.61  | 2.19E-04 |
| P.aeruginosa | tpp | NC_002516:4785861-4785864 | PA4277.3 | tRNA           | PA4277 | 5UTR | No  | 2.31   | 1.25E-05 |
| P.aeruginosa | tpp | NC_002516:4893916-4893928 | sodB     | protein_coding | PA4366 | CDS  | No  | 5.42   | 3.72E-05 |
| P.aeruginosa | tpp | NC_002516:4917085-4917092 | groEL    | protein_coding | PA4385 | CDS  | No  | 8.77   | 7.35E-01 |
| P.aeruginosa | tpp | NC_002516:4956479-4956486 | rnpB     | ncRNA          | PA4421 | 5UTR | No  | 2.31   | 3.63E-03 |
| P.aeruginosa | fmn | NC_002516:4994766-4994771 | ptsN     | protein_coding | PA4465 | 5UTR | No  | 8.34   | 3.12E-01 |
| P.aeruginosa | tpp | NC_002516:5322557-5322560 | PA4738   | protein_coding | PA4738 | CDS  | No  | 132.46 | 1.73E-02 |
| P.aeruginosa | tpp | NC_002516:5325732-5325743 | rpsO     | protein_coding | PA4740 | 5UTR | No  | 2.79   | 3.32E-04 |
| P.aeruginosa | tpp | NC_002516:5583734-5583879 | NA       | NA             | PA4973 | 5UTR | Yes | 44.11  | 7.23E-30 |
| P.aeruginosa | tpp | NC_002516:5623233-5623236 | PA5005   | protein_coding | PA5004 | 5UTR | No  | 15.12  | 4.10E+00 |
| P.aeruginosa | tpp | NC_002516:5884330-5884354 | ssrS     | ncRNA          | PA5228 | 5UTR | No  | 2.23   | 2.54E-08 |
| P.aeruginosa | tpp | NC_002516:932351-932352   | PA0853   | protein_coding | PA0853 | CDS  | No  | 2.82   | 1.56E+00 |

Supplementary Table 3. List of RNA aptamers found in *C. albicans*

| Species           | Region                   | Locus Name  | Closest Gene | Region Type | Known | Fold Change | E-value  |
|-------------------|--------------------------|-------------|--------------|-------------|-------|-------------|----------|
| <i>C.albicans</i> | Ca21chr1:1846664-1846715 | GCV2        | orf19.385    | CDS         | No    | 2.18        | 4.89E+00 |
| <i>C.albicans</i> | Ca21chr1:1883720-1883770 | GCD6        | orf19.407    | CDS         | No    | 5.18        | 6.21E+00 |
| <i>C.albicans</i> | Ca21chr1:2634070-2634125 | SER33       | orf19.5263   | 5UTR        | No    | 2.78        | 6.30E-01 |
| <i>C.albicans</i> | Ca21chr1:506778-506829   | GSC1        | orf19.2929   | CDS         | No    | 2.05        | 1.20E-01 |
| <i>C.albicans</i> | Ca21chr1:583654-583705   | TIF34       | orf19.2967   | CDS         | No    | 4.22        | 7.44E-02 |
| <i>C.albicans</i> | Ca21chr1:675684-675737   | BMH1        | orf19.3014   | CDS         | No    | 2.32        | 5.35E-07 |
| <i>C.albicans</i> | Ca21chr1:677952-678010   | ARX1        | orf19.3015   | CDS         | No    | 3.55        | 1.58E-01 |
| <i>C.albicans</i> | Ca21chr2:1033417-1033493 | CYT1        | orf19.3527   | CDS         | No    | 2.08        | 5.94E-04 |
| <i>C.albicans</i> | Ca21chr2:1508031-1508084 | SSC1        | orf19.1896   | CDS         | No    | 2.49        | 4.14E-08 |
| <i>C.albicans</i> | Ca21chr2:1512787-1512837 |             | orf19.1891   | CDS         | No    | 5.47        | 2.76E-02 |
| <i>C.albicans</i> | Ca21chr2:876857-876913   | orf19.804.1 | orf19.804.1  | CDS         | No    | 2.73        | 2.48E-07 |
| <i>C.albicans</i> | Ca21chr3:1096972-1097099 | RPL18       | orf19.5982   | CDS         | No    | 2.68        | 1.43E-80 |
| <i>C.albicans</i> | Ca21chr4:1585877-1586030 | UBI3        | orf19.3087   | 5UTR/CDS    | No    | 3.19        | 1.46E-40 |
| <i>C.albicans</i> | Ca21chr4:371006-371072   | MDH1-1      | orf19.4602   | CDS         | No    | 2.07        | 7.23E-17 |
| <i>C.albicans</i> | Ca21chr5:1146016-1146096 | orf19.4016  | orf19.4016   | CDS         | No    | 2.72        | 3.33E-05 |
| <i>C.albicans</i> | Ca21chr5:24826-25000     | FAS1        | orf19.979    | CDS         | No    | 2.57        | 5.61E-16 |
| <i>C.albicans</i> | Ca21chr5:26160-26212     | FAS1        | orf19.979    | CDS         | No    | 2.09        | 1.61E+00 |
| <i>C.albicans</i> | Ca21chr6:133205-133257   | PGK1        | orf19.3651   | CDS         | No    | 2.83        | 8.73E-01 |
| <i>C.albicans</i> | Ca21chrR:1387851-1387901 | HSP60       | orf19.717    | CDS         | No    | 2.36        | 3.82E-03 |
| <i>C.albicans</i> | Ca21chrR:1508821-1508871 | MIS11       | orf19.2364   | CDS         | No    | 2.50        | 7.46E+00 |
| <i>C.albicans</i> | Ca21chrR:1881062-1881112 | tE(UUC)7    | orf19.6449   | 3UTR        | No    | 3.04        | 4.09E-01 |
| <i>C.albicans</i> | Ca21chrR:1946197-1946248 | TUB1        | orf19.7308   | CDS         | No    | 2.19        | 7.62E+00 |
| <i>C.albicans</i> | Ca21chrR:384669-384720   | CDC60       | orf19.2560   | CDS         | No    | 2.43        | 3.02E+00 |
| <i>C.albicans</i> | Ca21chr1:950442-950479   | ATP1        | orf19.6854   | CDS         | No    | 4.42        | 1.48E-09 |

## Supplementary References

1. Das, R., Laederach, A., Pearlman, S. M., Herschlag, D. & Altman, R. B. SAFA: semi-automated footprinting analysis software for high-throughput quantification of nucleic acid footprinting experiments. *RNA* **11**, 344-354 (2005).
2. Winkler, W. C., Nahvi, A., Sudarsan, N., Barrick, J. E. & Breaker, R. R. An mRNA structure that controls gene expression by binding S-adenosylmethionine. *Nat. Struct. Biol.* **10**, 701-707 (2003).
3. Regulski, E. E. & Breaker, R. R. In-line probing analysis of riboswitches. *Methods Mol. Biol.* **419**, 53-67 (2008).
4. Sudarsan, N., Wickiser, J. K., Nakamura, S., Ebert, M. S. & Breaker, R. R. An mRNA structure in bacteria that controls gene expression by binding lysine. *Genes Dev.* **17**, 2688-2697 (2003).
5. Novichkov, P. S. *et al.* RegPrecise 3.0--a resource for genome-scale exploration of transcriptional regulation in bacteria. *BMC Genomics* **14**, 745-2164-14-745 (2013).
